# Supplementary material for: Prognostic impact of indoleamine 2,3-dioxygenase 1 (IDO1) mRNA expression on circulating tumour cells of patients with head and neck squamous cell carcinoma
Source: PubMed Central journal article supplement — ESMO Open. 2020 May 14;5(3):e000646. doi: 10.1136/esmoopen-2019-000646 (PMC7232623; doi:10.1136/esmoopen-2019-000646), 2020-05-14

Supplementary Figure S1: *IDO1* expression levels.

Overexpression of *IDO1* at baseline compared to the post-treatment counterparts ( $p=0.007$ ).

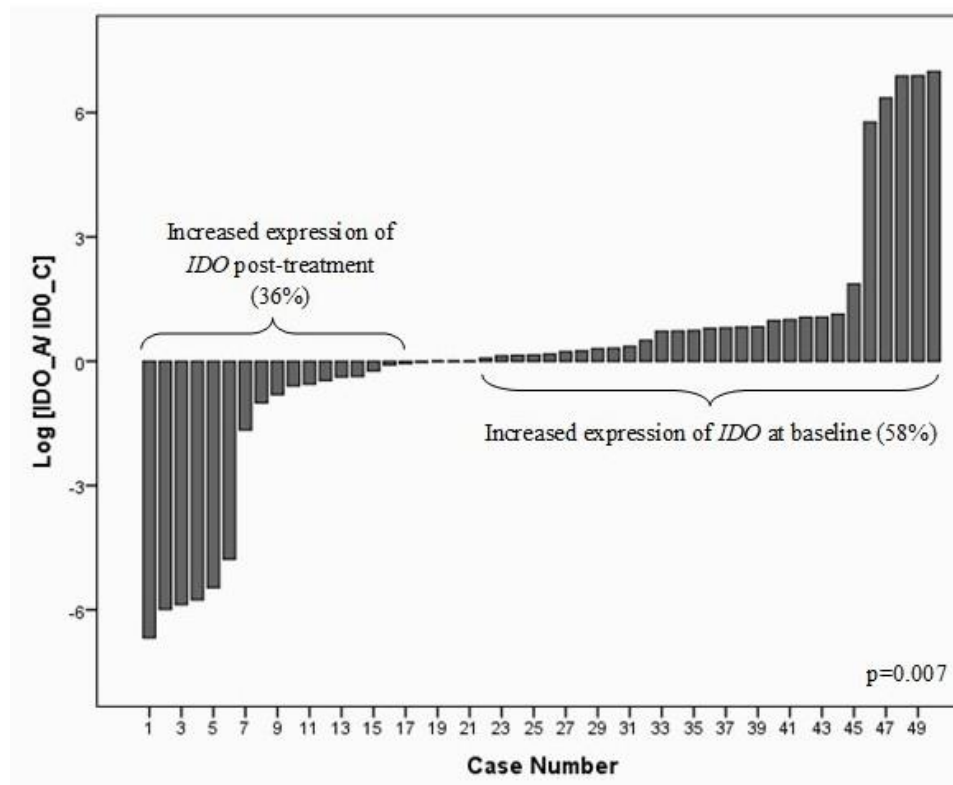

Supplement: esmoopen-2019-000646supp001.pdf [file esmoopen-2019-000646supp001.pdf]
