# Supplementary material for: Prognostic impact of indoleamine 2,3-dioxygenase 1 (IDO1) mRNA expression on circulating tumour cells of patients with head and neck squamous cell carcinoma
Source: PubMed Central journal article supplement — ESMO Open. 2020 May 14;5(3):e000646. doi: 10.1136/esmoopen-2019-000646 (PMC7232623; doi:10.1136/esmoopen-2019-000646), 2020-05-14
Supplement: esmoopen-2019-000646supp002.pdf [file esmoopen-2019-000646supp002.pdf]

**Supplementary Table S1.** Association of *IDO* expression levels, at baseline, with HNSCC patients' clinicopathological data

| Variable                | No. patients | Mean $\pm$ SD <sup>a</sup> | Median | P value                      |
|-------------------------|--------------|----------------------------|--------|------------------------------|
| <b>Sex</b>              |              |                            |        |                              |
| Male                    | 46           | 9.56 $\pm$ 14.43           | 2.69   | <b>0.030<sup>b</sup></b>     |
| Female                  | 14           | 3.79 $\pm$ 8.56            | 0.76   |                              |
| <b>Smoke</b>            |              |                            |        |                              |
| No                      | 12           | 3.33 $\pm$ 8.53            | 1.12   | <b>&lt;0.001<sup>c</sup></b> |
| Light                   | 8            | 0.91 $\pm$ 1.24            | 0.38   |                              |
| Heavy                   | 35           | 8.29 $\pm$ 13.91           | 2.29   |                              |
| Ex Heavy                | 5            | 16.74 $\pm$ 12.85          | 17.51  |                              |
| <b>EtOH Consumption</b> |              |                            |        |                              |
| No                      | 18           | 8.25 $\pm$ 15.1            | 1.54   | 0.73 <sup>c</sup>            |
| Social                  | 32           | 6.43 $\pm$ 11.72           | 1.77   |                              |
| Heavy                   | 10           | 6.70 $\pm$ 9.90            | 2.77   |                              |
| <b>HPV Status</b>       |              |                            |        |                              |
| Negative                | 5            | 6.58 $\pm$ 13.27           | 0.76   | 0.42 <sup>b</sup>            |
| Positive                | 5            | 19.15 $\pm$ 23.04          | 1.79   |                              |
| <b>Nodal Status</b>     |              |                            |        |                              |
| 0                       | 20           | 8.85 $\pm$ 14.86           | 1.43   | 0.72 <sup>c</sup>            |
| 1                       | 8            | 1.82 $\pm$ 2.19            | 0.98   |                              |
| 2                       | 31           | 7.38 $\pm$ 12.22           | 1.93   |                              |
| <b>TNM Stage</b>        |              |                            |        |                              |
| I                       | 1            |                            |        | 0.63 <sup>c</sup>            |
| II                      | 10           | 6.32 $\pm$ 10.31           | 1.43   |                              |
| III                     | 7            | 6.39 $\pm$ 10.78           | 2.60   |                              |
| IV                      | 42           | 7.45 $\pm$ 13.36           | 1.87   |                              |
| <b>Primary Site</b>     |              |                            |        |                              |
| Hypopharynx             | 8            | 4.34 $\pm$ 3.35            | 3.78   | 0.19 <sup>d</sup>            |
| Larynx                  | 13           | 2.65 $\pm$ 3.49            | 0.99   |                              |
| Oral Cavity             | 26           | 7.32 $\pm$ 13.86           | 1.09   |                              |
| Oropharynx              | 13           | 12.44 $\pm$ 16.6           | 3.65   |                              |

|                            |    |            |      |                          |
|----------------------------|----|------------|------|--------------------------|
| <b>Histology</b>           |    |            |      |                          |
| High                       | 18 | 8.69±14.63 | 1.77 |                          |
| Intermediate               | 31 | 7.50±12.92 | 1.43 |                          |
| Low Intermediate           | 2  | 1.61±1.36  | 1.62 | 0.41 <sup>c</sup>        |
| Low                        | 8  | 2.15±3.00  | 1.12 |                          |
| Undifferentiated           | 1  |            |      |                          |
| <b>Disease Progression</b> |    |            |      |                          |
| No                         | 40 | 9.40±14.14 | 2.65 |                          |
| Yes                        | 20 | 2.25±5.44  | 0.77 | <b>0.006<sup>b</sup></b> |

---

<sup>a</sup> Standard Deviation

<sup>b</sup> Calculated using the "Mann Whitney test"

<sup>c</sup> Calculated using the "Jonckheere–Terpstra test"

<sup>d</sup> Calculated using the "Kruskal Wallis Test"
