# Supplementary material for: Prognostic impact of indoleamine 2,3-dioxygenase 1 (IDO1) mRNA expression on circulating tumour cells of patients with head and neck squamous cell carcinoma
Source: PubMed Central journal article supplement — ESMO Open. 2020 May 14;5(3):e000646. doi: 10.1136/esmoopen-2019-000646 (PMC7232623; doi:10.1136/esmoopen-2019-000646), 2020-05-14
Supplement: esmoopen-2019-000646supp003.pdf [file esmoopen-2019-000646supp003.pdf]

**Supplementary Table 2.** Association of post treatment *IDO* expression with HNSCC patients' clinicopathological data

| Variable                | No. patients | Mean $\pm$ SD <sup>a</sup> | Median | P value            |
|-------------------------|--------------|----------------------------|--------|--------------------|
| <b>Sex</b>              |              |                            |        |                    |
| Male                    | 42           | 3.58 $\pm$ 7.52            | 1.15   | 0.085 <sup>b</sup> |
| Female                  | 18           | 1.12 $\pm$ 1.67            | 0.64   |                    |
| <b>Smoke</b>            |              |                            |        |                    |
| No                      | 9            | 0.53 $\pm$ 0.58            | 0.30   | 0.029 <sup>c</sup> |
| Light                   | 7            | 2.95 $\pm$ 4.3             | 1.00   |                    |
| Heavy                   | 40           | 3.27 $\pm$ 7.62            | 0.98   |                    |
| Ex Heavy                | 4            | 3.50 $\pm$ 1.70            | 3.78   |                    |
| <b>EtOH Consumption</b> |              |                            |        |                    |
| No                      | 16           | 3.61 $\pm$ 11.51           | 0.31   | 0.067 <sup>c</sup> |
| Social                  | 33           | 2.73 $\pm$ 3.46            | 1.16   |                    |
| Heavy                   | 11           | 2.04 $\pm$ 2.36            | 1.11   |                    |
| <b>HPV Status</b>       |              |                            |        |                    |
| Negative                | 6            | 1.28 $\pm$ 2.10            | 0.41   | 0.53 <sup>b</sup>  |
| Positive                | 9            | 6.75 $\pm$ 15.05           | 1.04   |                    |
| <b>Nodal Status</b>     |              |                            |        |                    |
| 0                       | 20           | 1.91 $\pm$ 2.32            | 1.10   | 0.28 <sup>c</sup>  |
| 1                       | 9            | 3.45 $\pm$ 4.32            | 1.22   |                    |
| 2                       | 30           | 3.34 $\pm$ 8.59            | 0.56   |                    |
| <b>TNM Stage</b>        |              |                            |        |                    |
| I                       | 1            | -                          | -      | 0.34 <sup>c</sup>  |
| II                      | 8            | 1.87 $\pm$ 1.85            | 1.22   |                    |
| III                     | 7            | 3.94 $\pm$ 5.25            | 1.11   |                    |
| IV                      | 44           | 2.88 $\pm$ 7.21            | 0.91   |                    |
| <b>Primary Site</b>     |              |                            |        |                    |
| Hypopharynx             | 4            | 0.84 $\pm$ 1.02            | 0.64   | 0.61 <sup>d</sup>  |
| Larynx                  | 16           | 1.31 $\pm$ 1.61            | 0.76   |                    |
| Oral Cavity             | 24           | 2.98 $\pm$ 3.85            | 1.15   |                    |
| Oropharynx              | 16           | 4.65 $\pm$ 11.4            | 0.88   |                    |

|                            |    |            |      |                   |
|----------------------------|----|------------|------|-------------------|
| <b>Histology</b>           |    |            |      |                   |
| High                       | 21 | 3.71±10.27 | 0.95 |                   |
| Intermediate               | 27 | 2.80±3.11  | 1.30 |                   |
| Low Intermediate           | 1  | -          | -    | 0.84 <sup>c</sup> |
| Low                        | 10 | 1.08±1.58  | 0.88 |                   |
| Undifferentiated           | 1  | -          | -    |                   |
| <b>Disease Progression</b> |    |            |      |                   |
| No                         | 43 | 3.17±7.45  | 0.95 |                   |
| Yes                        | 17 | 2.00±2.31  | 1.15 | 0.48 <sup>b</sup> |

---

<sup>a</sup> Standard Deviation

<sup>b</sup> Calculated using the "Mann Whitney test"

<sup>c</sup> Calculated using the "Jonckheere–Terpstra test"

<sup>d</sup> Calculated using the "Kruskal Wallis Test"
